# Supplementary material
Source: Springer Nature journal article supplement (https://www.springermedizin.de/resource/supplementary/12877_2010_327_MOESM4_ESM.pdf/9439394)

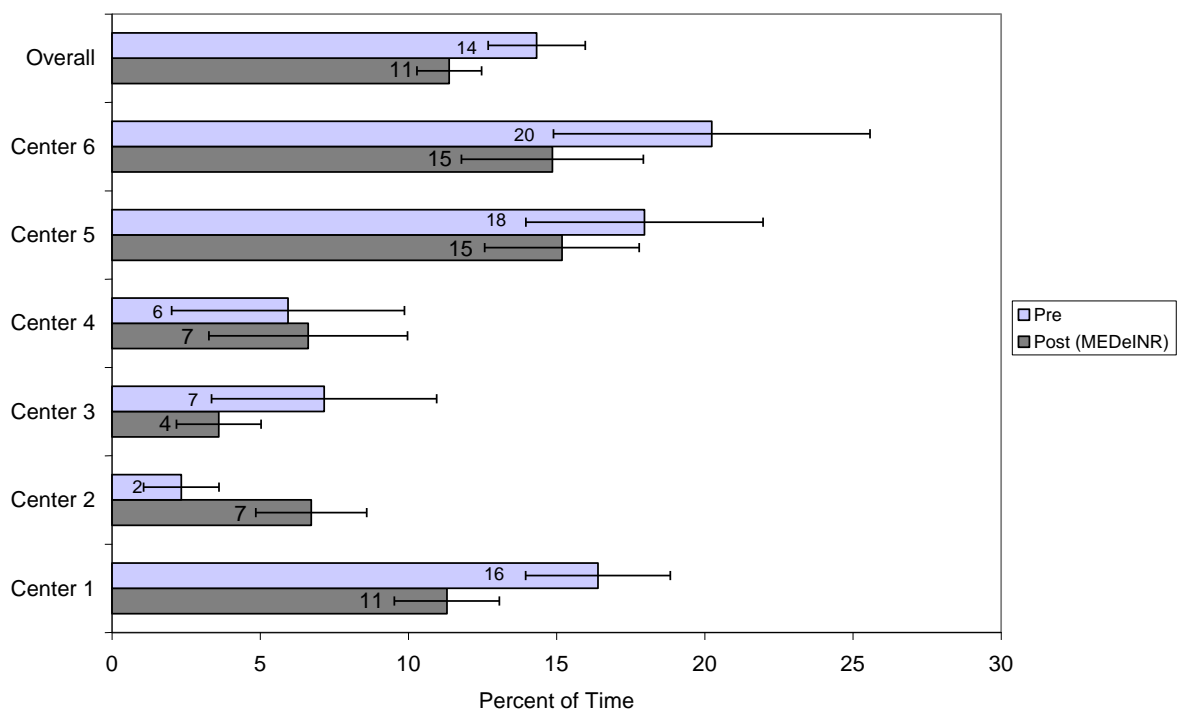

Supplement: MOESM4 [file 9439394]
